# Supplementary material
Source: publisher figshare collection journal article supplement (https://acs.figshare.com/ndownloader/files/12471383)
Supplement: Supplementary file 1 [file 12471383]

# Supporting Information for

## Internal nanostructure diagnosis with hyperbolic phonon polaritons in hexagonal boron nitride

*Siyuan Dai<sup>†</sup>, Mykhailo Tymchenko<sup>†</sup>, Zaiquan Xu<sup>‡</sup>, Toan T. Tran<sup>‡</sup>, Yafang Yang<sup>§</sup>, Qiong Ma<sup>§</sup>, Kenji Watanabe<sup>||</sup>, Takashi Taniguchi<sup>||</sup>, Pablo Jarillo-Herrero<sup>§</sup>, Igor Aharonovich<sup>‡</sup>, Dimitri N Basov<sup>Δ</sup>, Tiger H Tao<sup>□</sup>, Andrea Alù<sup>†±×∇\*</sup>.*

<sup>†</sup> Department of Electrical & Computer Engineering, The University of Texas at Austin, Texas 78712, USA

<sup>‡</sup> Institute of Biomedical Materials and Devices, Faculty of Science, University of Technology Sydney, Ultimo, New South Wales 2007, Australia

<sup>§</sup> *Department of Physics, Massachusetts Institute of Technology, Cambridge, Massachusetts 02215, USA*

<sup>||</sup> *National Institute for Materials Science, Namiki 1-1, Tsukuba, Ibaraki 305-0044, Japan*

<sup>Δ</sup> Department of Physics, Columbia University, New York, New York 10027, USA

<sup>□</sup> Department of Mechanical Engineering, The University of Texas at Austin, Texas 78712, USA

<sup>±</sup> Photonics Initiative, Advanced Science Research Center, City University of New York, New York 10031, USA

<sup>□</sup> Physics Program, Graduate Center, City University of New York, New York 10016, USA

<sup>□</sup> Department of Electrical Engineering, City College of The City University of New York, New York 10031, USA

\* Correspondence to: [aalu@gc.cuny.edu](mailto:aalu@gc.cuny.edu)

## 1. Simulation of hyperbolic phonon polaritons in hexagonal boron nitride with/without the internal defect

Collective electromagnetic modes can be identified with the maxima of dissipation, that is the imaginary part of the complex reflectivity  $r_p(q, \omega)$ <sup>1</sup>. Our system consists five layers: top hBN, air gap, bottom hBN, SiO<sub>2</sub> and Si for the defective hBN part, and three layers: hBN, SiO<sub>2</sub> and Si for the pristine hBN part. The complex  $r_p$  can be derived from Fresnel equations for these multilayer system<sup>2</sup>:

$$r_{p_{air\_hBN\_interface}} = \frac{\varepsilon_{hBN\_z} k_{air}^z - \varepsilon_{air} k_e^z}{\varepsilon_{hBN\_z} k_{air}^z + \varepsilon_{air} k_e^z} \quad (S1)$$

$$r_{p_{hBN\_SiO2\_interface}} = \frac{\varepsilon_{SiO2} q_e^z - \varepsilon_{hBN\_z} q_{SiO2}^z}{\varepsilon_{SiO2} q_e^z + \varepsilon_{hBN\_z} q_{SiO2}^z} \quad (S2)$$

$$r_{p_{SiO2\_Si\_interface}} = \frac{\varepsilon_{Si} q_{SiO2}^z - \varepsilon_{SiO2} q_{Si}^z}{\varepsilon_{Si} q_{SiO2}^z + \varepsilon_{SiO2} q_{Si}^z} \quad (S3)$$

$$r_{p_{SiO2}} = \frac{r_{p_{hBN\_SiO2\_interface}} + r_{p_{SiO2\_Si\_interface}} e^{i2q_{SiO2}^z d_{SiO2}}}{1 + r_{p_{hBN\_SiO2\_interface}} r_{p_{SiO2\_Si\_interface}} e^{i2q_{SiO2}^z d_{SiO2}}} \quad (S4)$$

where  $\varepsilon$  is the permittivity along the indicated axis in each layer and  $q$  represents the directional momentum of the photon in each layer. The subscript “e” stands for “extraordinary ray” of hBN which is optically uniaxial.

By tracking the maxima of complex reflectivity  $r_p(q, \omega)$ , we can simulate the hyperbolic phonon polaritons in Figures 2 and 3 of the main text.

## 2. Numerical modeling of polaritons and reflection, transmission and scattering

Numerical modelling of polaritons in hBN was performed using COMSOL Multiphysics. For this purpose, we designed a model of the cross-section of the hBN slab with a defect, as shown in Fig. 4C in the main text. The lowest-order hBN polaritons<sup>2, 3</sup> were excited from the left-side of hBN Region 1 using a numerical port (Port 1)<sup>4</sup>. Upon reaching the interior defect, the polariton energy get transmitted into hBN Region 2, reflected back to hBN Region 1 and scattered into higher-order polaritons. The output ports (Port 1 and Port 2 at the right-side of hBN Region 2) were configured to receive only the lowest-order mode: we performed the simulation on the hBN slab with a large lateral size such that only the lowest-order hBN polaritons can reach these ports while the higher-order polaritons get damped.

To obtain the Reflection  $R$  and Transmission  $T$  at the defect, we applied the same procedure as in Ref. <sup>4</sup>. Briefly, hBN Region 1 and 2 support polaritons with effective indexes  $n_i = n_i' - jn_i''$

( $n_i', n_i'' > 0$  where  $i = 1, 2$  is the region/port number), the scattering parameters at the defect:  $\tilde{S}_{ij}$ , can be evaluated from the scattering parameters at the ports,  $S_{ij}$ , as<sup>5</sup>:

$$\begin{aligned}\tilde{S}_{ii} &= S_{ii} e^{j2k_0 n_i L_i} \\ \tilde{S}_{ij} &= S_{ij} e^{jk_0(n_i L_i + n_j L_j)},\end{aligned}$$

where  $k_0 = \omega / c$  is the free-space photon momentum and  $L_i$  is the distance between Port  $i$  and the defect. The reflection and transmission coefficients are:

$$\begin{aligned}R &= |S_{11}|^2, \\ T &= |S_{21}|^2.\end{aligned}$$

The energy scattered into higher-order polaritons can be obtained with  $S = 1 - R - T$ .

## References

1. Zhang, L. M.; Andreev, G. O.; Fei, Z.; McLeod, A. S.; Dominguez, G.; Thiemens, M.; Castro-Neto, A. H.; Basov, D. N.; Fogler, M. M. *Physical Review B* **2012**, 85, (7), 075419.
2. Dai, S.; Fei, Z.; Ma, Q.; Rodin, A. S.; Wagner, M.; McLeod, A. S.; Liu, M. K.; Gannett, W.; Regan, W.; Watanabe, K.; Taniguchi, T.; Thiemens, M.; Dominguez, G.; Neto, A. H. C.; Zettl, A.; Keilmann, F.; Jarillo-Herrero, P.; Fogler, M. M.; Basov, D. N. *Science* **2014**, 343, (6175), 1125-1129.
3. Caldwell, J. D.; Kretinin, A. V.; Chen, Y.; Giannini, V.; Fogler, M. M.; Francescato, Y.; Ellis, C. T.; Tischler, J. G.; Woods, C. R.; Giles, A. J.; Hong, M.; Watanabe, K.; Taniguchi, T.; Maier, S. A.; Novoselov, K. S. *Nat Commun* **2014**, 5.
4. Dai, S.; Tymchenko, M.; Yang, Y.; Ma, Q.; Pita-Vidal, M.; Watanabe, K.; Taniguchi, T.; Jarillo-Herrero, P.; Fogler, M. M.; Alù, A.; Basov, D. N. *Advanced Materials*, 1706358-n/a.
5. Collin, R. E., *Foundations for Microwave Engineering*. 2nd ed.; Wiley: New York, 2001.
